# Supplementary material for: An expanded sandwich-like heterostructure with thin FeP nanosheets@graphene via charge-driven self-assembly as high-performance anodes for sodium ion battery
Source: Royal Society of Chemistry journal article supplement (doi:10.1039/d2nr00691j), 2022-01-01
Supplement: d2nr00691j1.pdf [file d2nr00691j1.pdf]

1 Supporting Information

2

3 **Expanded Sandwich-like Heterostructure with Thin FeP**

4 **Nanosheets@Graphene via Charge-Driven Self-Assembly as High-**

5 **Performance Anodes for Sodium Ion Battery**

6 *Seungman Park*<sup>a, 1</sup>, *Dongwon Kim*<sup>a, 1</sup>, *Myeongseok Jang*<sup>a</sup>, *Taejin Hwang*<sup>a</sup>, *Seon Jae Hwang*

7 *a*, and *Yuanzhe Piao*<sup>a, b, \*</sup>

8

9 <sup>a</sup> Graduate School of Convergence Science and Technology, Seoul National University, 145

10 Gwanggyo-ro, Yeongtong-gu, Suwon-Si, Gyeonggi-do, 16229, Republic of Korea

11 <sup>b</sup> Advanced Institutes of Convergence Technology, 145 Gwanggyo-ro, Yeongtong-gu, Suwon-

12 si, Gyeonggi-do, 16229, Republic of Korea

13 E-mail: parkat9@snu.ac.kr (Y. Piao)

14

15 <sup>1</sup> These authors contributed equally to this work.

16

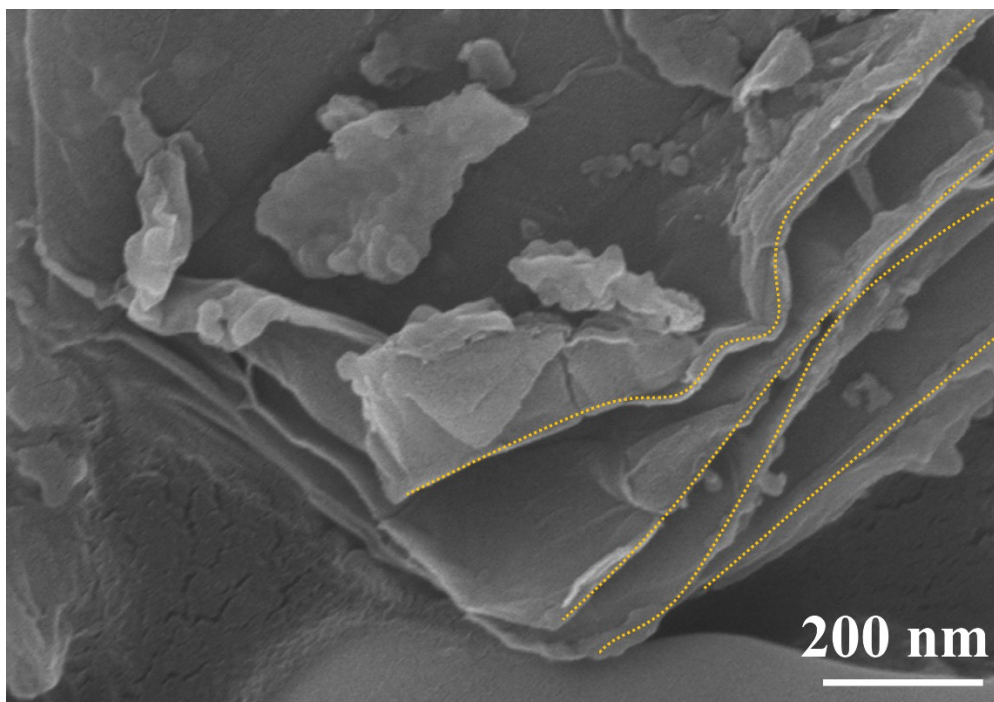

1

**Fig. S1** High-resolution SEM image of expanded FeP NSs@rGO.

2

3

4

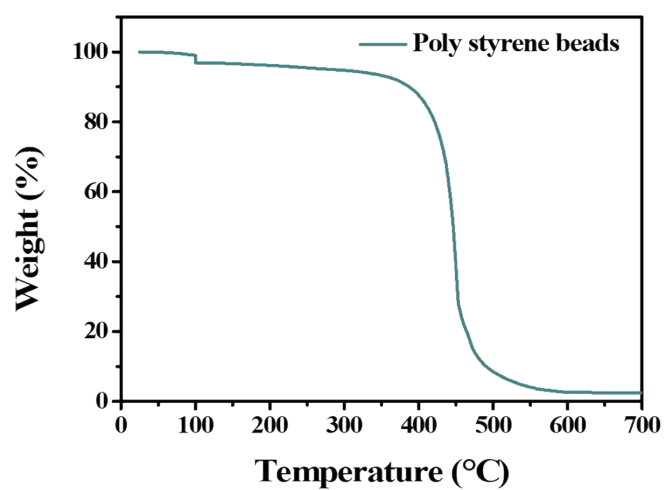

5

**Fig. S2** TGA measurement of polystyrene beads (PSBs) with temperature range from 25 to 700

°C under Ar flow.

7

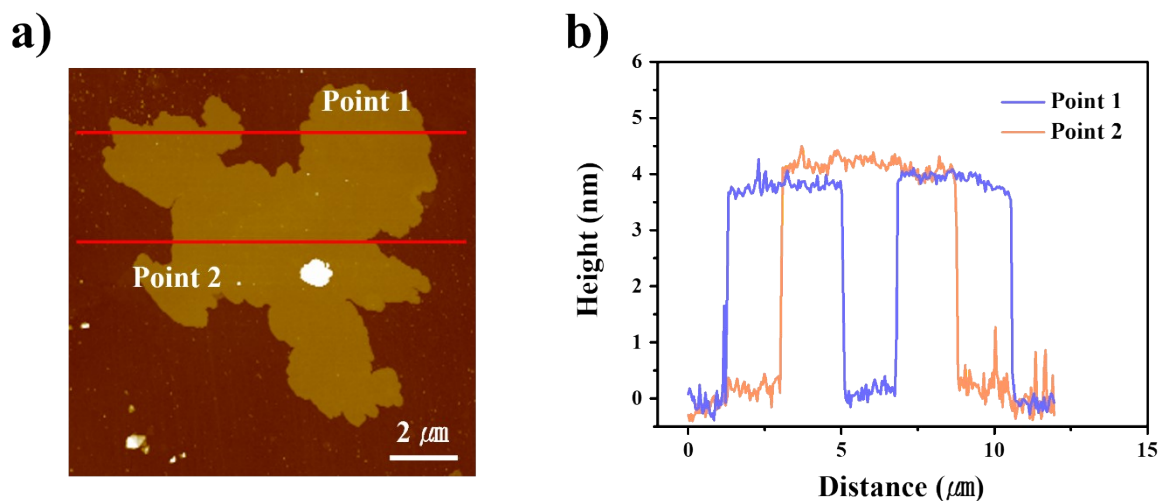

1

2 **Fig. S3** Atomic force microscope (AFM) analysis of Fe-Tris NSs (a) and the corresponding  
 3 plot of distance versus height (b).

4

5

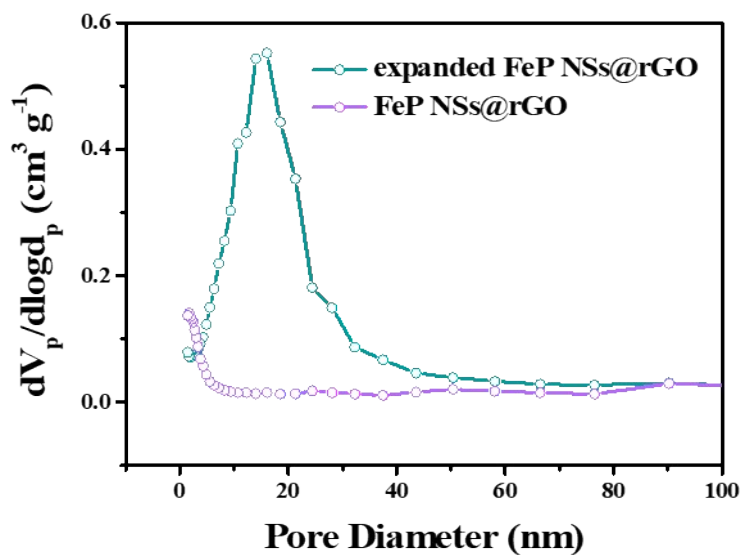

6

7 **Fig. S4** Pore size distribution curves of expanded FeP NSs@rGO and FeP NSs@rGO  
 8 samples.

1

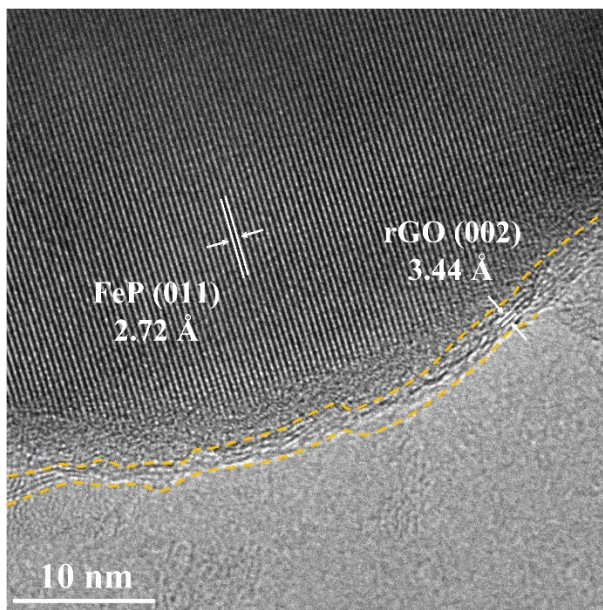

2

3 **Fig. S5** HR-TEM image of expanded FeP NSs@rGO.

4

5

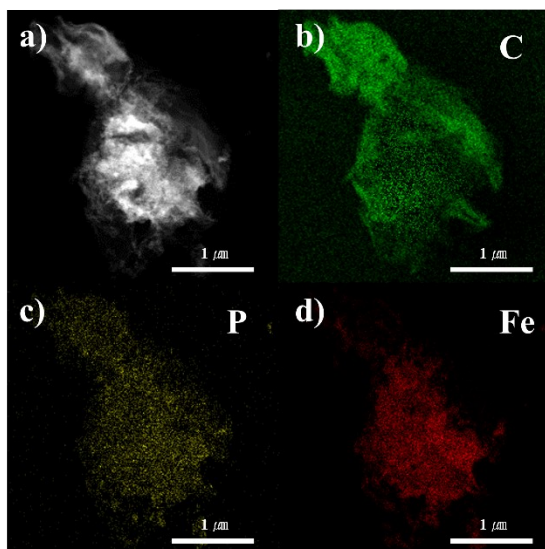

6

7 **Fig. S6** EDS mapping images of FeP NSs@rGO.

1

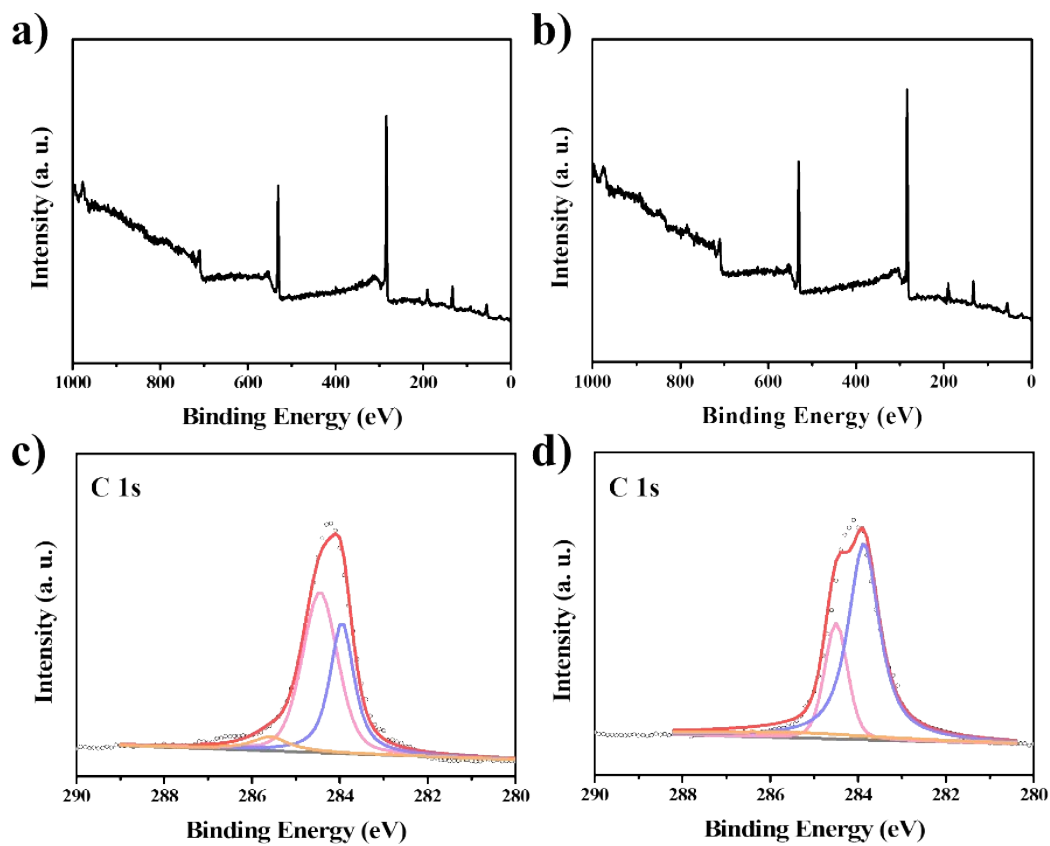

2

3 **Fig. S7** XPS survey spectra of expanded FeP NSs@rGO (a), and FeP NSs@rGO (b); C 1s  
4 spectra for expanded FeP NSs@rGO (c), and FeP NSs@rGO (d).

5

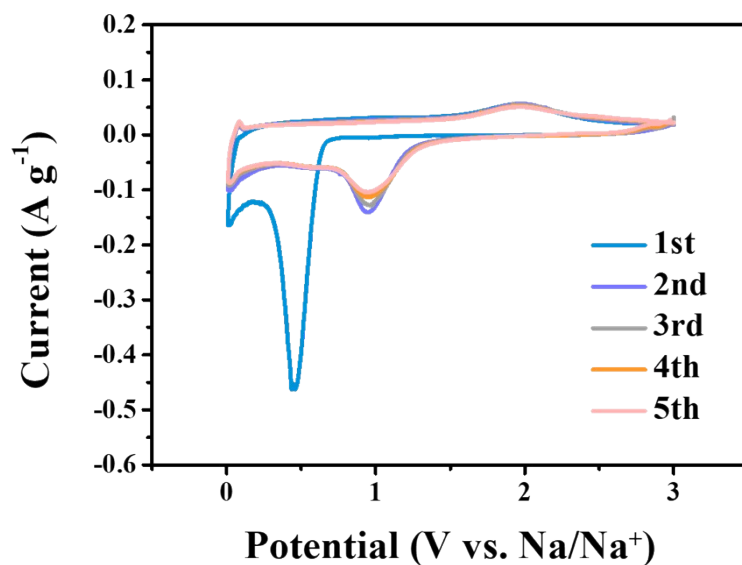

1

2 **Fig. S8** CV curves of FeP NSs@rGO electrode of the first 5 cycles at a scan rate of  $0.1 \text{ mV s}^{-1}$   
 3 in the potential range of  $0.001 \sim 3 \text{ V vs. Na/Na}^+$ .

4

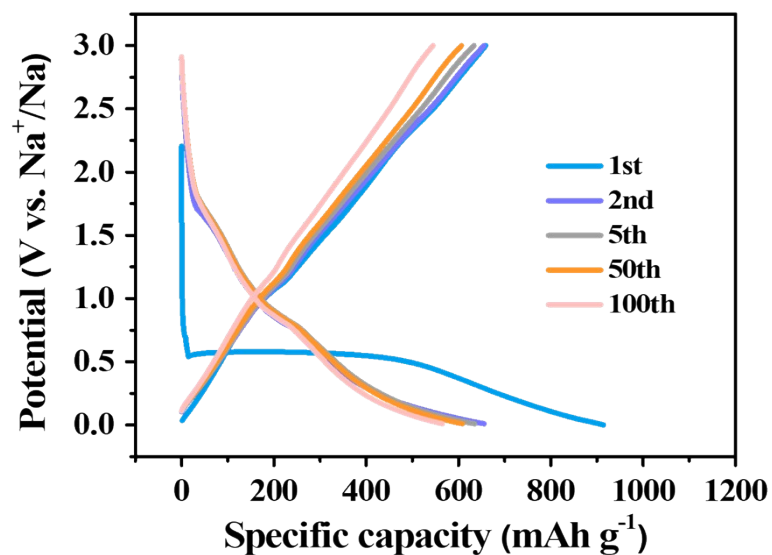

5

6 **Fig. S9** Galvanostatic discharge-charge profiles of FeP NSs@rGO electrode of the first 100  
 7 cycles at a current density of  $0.1 \text{ A g}^{-1}$ .

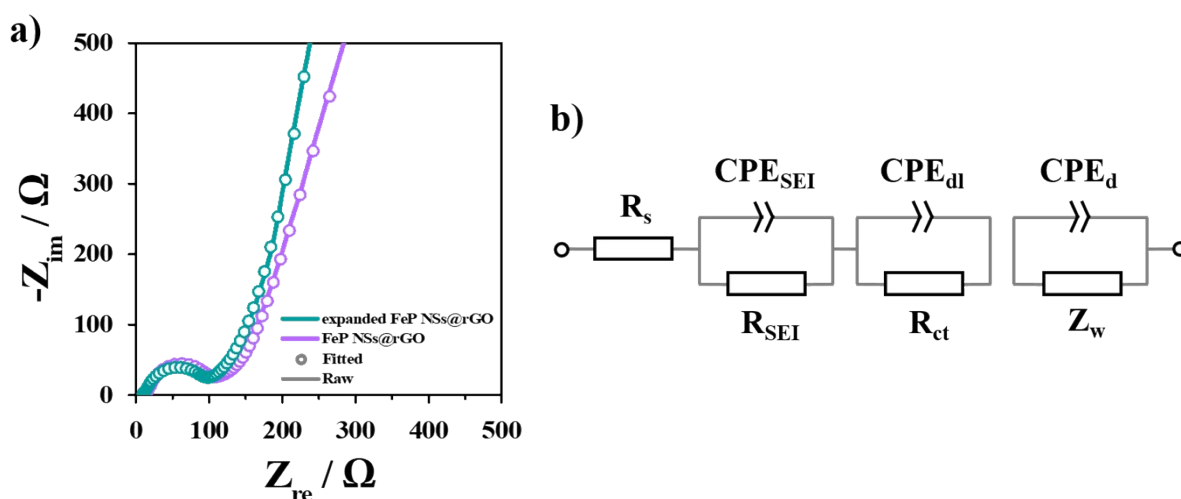

1

2 **Fig. S10** Nyquist plot of expanded FeP NSs@rGO and FeP NSs@rGO electrodes (a), and  
 3 corresponding equivalent circuits for expanded FeP NSs@rGO and FeP NSs@rGO electrodes  
 4 (b).

5

| Sample               | Carbon content (wt %) |
|----------------------|-----------------------|
| FeP NSs@rGO          | 5.03                  |
| expanded FeP NSs@rGO | 5.37                  |

6

7 **Table S1** Elemental analysis of FeP NSs@rGO and expanded FeP NSs@rGO.

8

| Samples              | $R_{\Omega} / \Omega \cdot \text{cm}^{-2}$ | $R_{\text{SEI}} / \Omega \cdot \text{cm}^{-2}$ | $R_{\text{ct}} / \Omega \cdot \text{cm}^{-2}$ |
|----------------------|--------------------------------------------|------------------------------------------------|-----------------------------------------------|
| expanded FeP NSs@rGO | $7.47 \pm 0.19$                            | $10.02 \pm 2.12$                               | $72.12 \pm 1.34$                              |
| FeP NSs@rGO          | $8.87 \pm 0.23$                            | $12.98 \pm 5.32$                               | $78.28 \pm 5.24$                              |

9

10 **Table S2** The fitting values of the resistance components in the simplified equivalent circuit.

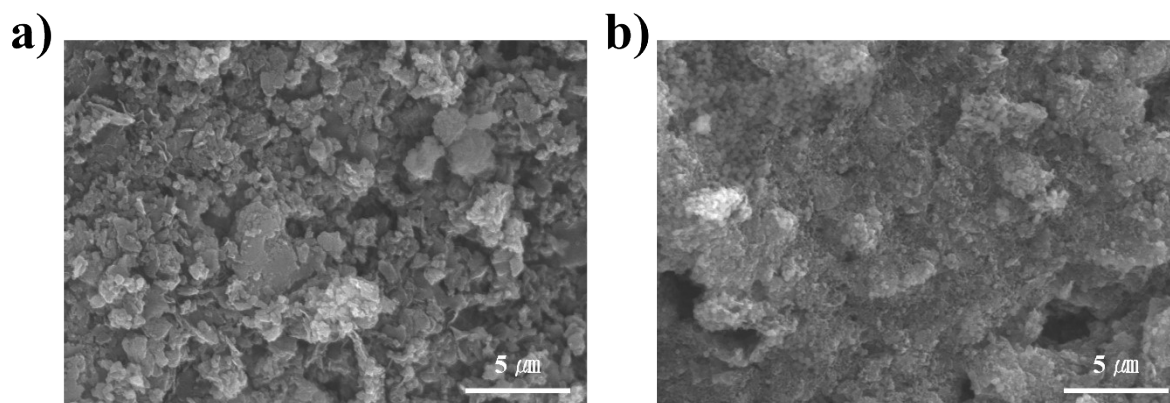

2 **Fig. S11** SEM images of FeP NSs@rGO (a) and expanded FeP NSs@rGO (b) electrodes after  
 3 100 cycles at a current density of 1 A g<sup>-1</sup>.

4

5

6

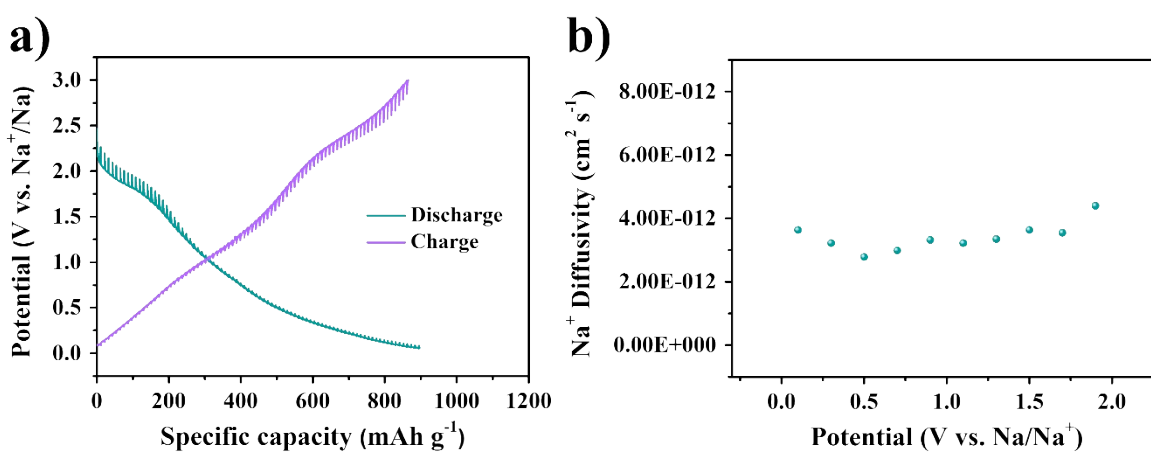

8 **Fig. S12** The GITT curves (a) and the Na<sup>+</sup> diffusion coefficient (b) of expanded FeP  
 9 NSs@rGO.

10



1

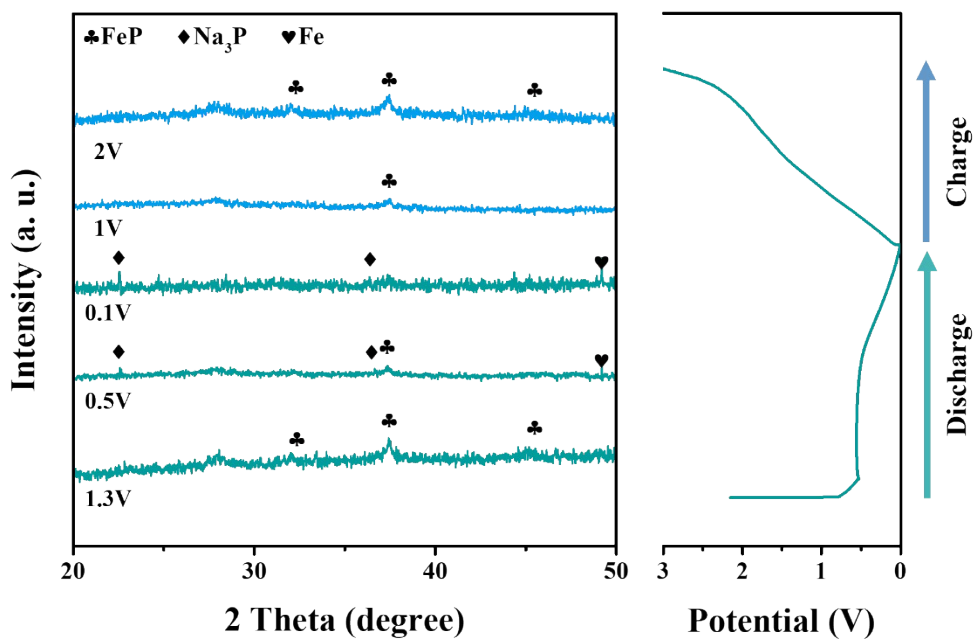

2

3 **Fig. S13** Ex-situ XRD patterns of expanded FeP NSs@rGO anode with the corresponding  
4 galvanostatic discharge-charge profiles at a current density of 0.1 A g<sup>-1</sup>.

5

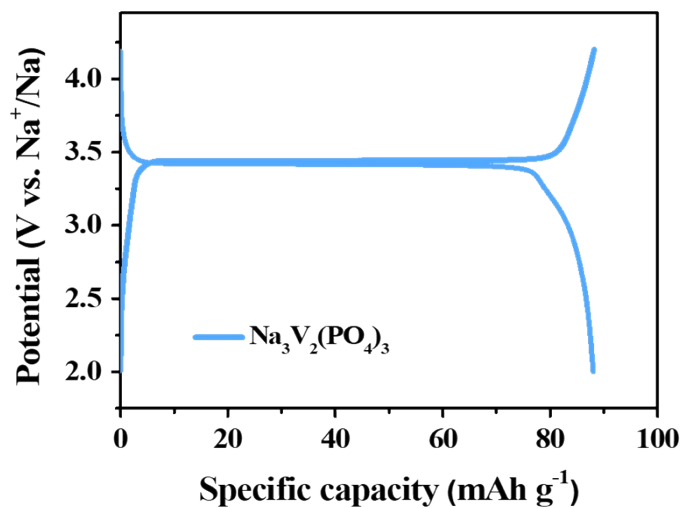

6

1 **Fig. S14** Galvanostatic discharge-charge profiles of  $\text{Na}_3\text{V}_2(\text{PO}_4)_3$  electrode at a current density  
2 of  $0.1 \text{ A g}^{-1}$ .

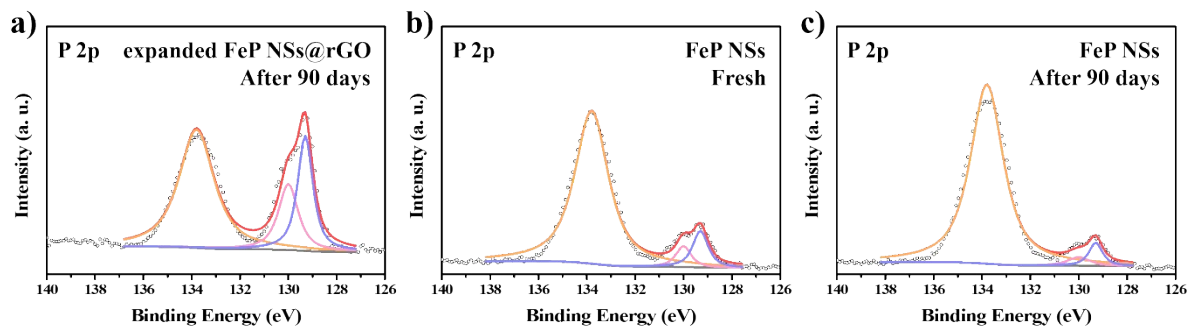

4 **Fig. S15** XPS survey spectra of the air stability. P 2p spectra for expanded FeP NSs@rGO after  
5 exposure to the ambient atmosphere for 90 days (a), fresh FeP NSs (b), and FeP NSs after  
6 90days (c).
